# Supplementary material
Source: PubMed Central journal article supplement (PMC7598774)
Supplement: NIHMS1639108-supplement-supp1-2977531.pdf [file NIHMS1639108-supplement-supp1-2977531.pdf]

SUPPLEMENTARY TABLE I

PERFORMANCE COMPARISON OF INDIVIDUAL CLASSIFICATION METHODS TO PREDICT THE OCCURRENCE OF POSTOPERATIVE DEFICIT.

| Classification method     | Function | $\beta = 0.9$ | $\beta = 0.8$ | $\beta = 0.7$ | $\beta = 0.6$ | $\beta = 0.5$ | $\beta = 0.4$ | $\beta = 0.3$ | $\beta = 0.2$ | $\beta = 0.1$ | $\beta = 0$ |
|---------------------------|----------|---------------|---------------|---------------|---------------|---------------|---------------|---------------|---------------|---------------|-------------|
| DWI-MAP                   | Motor    | 0.95          | 0.94          | 0.94          | 0.93          | 0.91          | 0.92          | 0.90          | 0.88          | 0.88          | 0.88        |
|                           | Language | 0.89          | 0.86          | 0.87          | 0.86          | 0.86          | 0.87          | 0.88          | 0.89          | 0.88          | 0.85        |
|                           | Visual   | 0.78          | 0.79          | 0.80          | 0.79          | 0.83          | 0.82          | 0.83          | 0.83          | 0.83          | 0.86        |
|                           | Total    | 0.90          | 0.87          | 0.88          | 0.87          | 0.87          | 0.87          | 0.87          | 0.87          | 0.87          | 0.86        |
| DWI-MAP+ADFD              | Motor    | 0.96          | 0.96          | 0.96          | 0.94          | 0.95          | 0.94          | 0.95          | 0.93          | 0.93          | 0.93        |
|                           | Language | 0.88          | 0.89          | 0.88          | 0.89          | 0.90          | 0.88          | 0.89          | 0.89          | 0.87          | 0.88        |
|                           | Visual   | 0.85          | 0.83          | 0.83          | 0.83          | 0.85          | 0.83          | 0.85          | 0.83          | 0.83          | 0.88        |
|                           | Total    | 0.90          | 0.90          | 0.90          | 0.90          | 0.91          | 0.89          | 0.91          | 0.89          | 0.89          | 0.90        |
| RecoBundles               | Motor    | 0.96          | 0.94          | 0.96          | 0.95          | 0.93          | 0.93          | 0.93          | 0.92          | 0.91          | 0.92        |
|                           | Language | 0.83          | 0.84          | 0.83          | 0.79          | 0.85          | 0.81          | 0.81          | 0.82          | 0.83          | 0.83        |
|                           | Visual   | 0.81          | 0.76          | 0.73          | 0.74          | 0.71          | 0.78          | 0.73          | 0.75          | 0.79          | 0.74        |
|                           | Total    | 0.87          | 0.86          | 0.85          | 0.83          | 0.84          | 0.84          | 0.83          | 0.84          | 0.84          | 0.84        |
| DCNN tract classification | Motor    | 0.99          | 0.97          | 0.95          | 0.96          | 0.97          | 0.92          | 0.94          | 0.96          | 0.98          | 0.97        |
|                           | Language | 0.89          | 0.86          | 0.82          | 0.78          | 0.78          | 0.83          | 0.81          | 0.79          | 0.81          | 0.81        |
|                           | Visual   | 0.91          | 0.94          | 0.88          | 0.84          | 0.83          | 0.83          | 0.80          | 0.71          | 0.75          | 0.73        |
|                           | Total    | 0.92          | 0.91          | 0.88          | 0.85          | 0.85          | 0.86          | 0.85          | 0.83          | 0.85          | 0.84        |
